# Supplementary material for: ID-Checker Technology for the Highly Selective Macroscale Delivery of Anticancer Agents to the Cancer Cells
Source: PubMed Central journal article supplement — J Med Chem. 2022 Oct 4;65(19):12883–94. doi: 10.1021/acs.jmedchem.2c00646 (PMC9575670; doi:10.1021/acs.jmedchem.2c00646), 2022-10-04
Supplement: jm2c00646_si_001.pdf [file jm2c00646_si_001.pdf]

# Supporting information

## ID-Checker technology for the highly selective macroscale delivery of anticancer agents to the cancer cells

Keum-soo Song,<sup>2,3</sup> Satish Balasaheb Nimse,<sup>1,3</sup> Junghoon Kim,<sup>2</sup> Shrikant Dashrath Warkad,<sup>2</sup> Taisun Kim<sup>1\*</sup>

<sup>1</sup>Institute of Applied Chemistry and Department of Chemistry, Hallym University, Chuncheon 200702, South Korea.

<sup>2</sup>Biometrix Technology, Inc., 2-2 Bio Venture Plaza 56, Chuncheon 24232, South Korea

<sup>3</sup>These authors contributed equally.

\*Corresponding author. Email: tskim@hallym.ac.kr

| Sr. No. | Content                                                                                                                                                                                                                                                                                                                                  | Page No. |
|---------|------------------------------------------------------------------------------------------------------------------------------------------------------------------------------------------------------------------------------------------------------------------------------------------------------------------------------------------|----------|
| 1       | <b>Figure S1.</b> <sup>1</sup> H NMR spectrum of <b>AI-NH<sub>2</sub></b> in CD <sub>3</sub> OD.                                                                                                                                                                                                                                         | S2       |
| 2       | <b>Figure S2.</b> <sup>13</sup> C NMR spectrum of <b>AI-NH<sub>2</sub></b> in CD <sub>3</sub> OD.                                                                                                                                                                                                                                        | S2       |
| 3       | <b>Figure S3.</b> Mass spectrum of <b>AI-NH<sub>2</sub></b> .                                                                                                                                                                                                                                                                            | S3       |
| 4       | <b>Figure S4.</b> <sup>1</sup> H NMR spectrum of <b>AI-NH<sub>2</sub>.HCl</b> in DMSO-d <sub>6</sub> .                                                                                                                                                                                                                                   | S3       |
| 5       | <b>Fig. S5.</b> <sup>13</sup> C NMR spectrum of <b>AI-NH<sub>2</sub>.HCl</b> in DMSO-d <sub>6</sub> .                                                                                                                                                                                                                                    | S4       |
| 6       | <b>Fig. S6.</b> Mass spectrum of <b>AI-NH<sub>2</sub>.HCl</b>                                                                                                                                                                                                                                                                            | S4       |
| 7       | <b>Fig. S7.</b> <sup>1</sup> H NMR spectrum of <b>AI-G</b> in CD <sub>3</sub> OD.                                                                                                                                                                                                                                                        | S5       |
| 8       | <b>Fig. S8.</b> <sup>13</sup> C NMR spectrum of <b>AI-G</b> in CD <sub>3</sub> OD.                                                                                                                                                                                                                                                       | S5       |
| 9       | <b>Fig. S9.</b> Mass spectrum of <b>AI-G</b> .                                                                                                                                                                                                                                                                                           | S6       |
| 10      | <b>Fig. S10.</b> HPLC trace for 1mM <b>AI-NH<sub>2</sub></b> in MeOH (Eluent, 100% MeOH; Pressure, 10 bar; Injection volume, 10 μL; Oven temp., 40 °C).                                                                                                                                                                                  | S6       |
| 11      | <b>Fig. S11.</b> HPLC traces for <b>AI-NH<sub>2</sub>.HCl</b> (Eluent, 100% MeOH; Pressure, 10 bar; Injection volume, 10 μL; Oven temp., 40 °C).                                                                                                                                                                                         | S7       |
| 12      | <b>Fig. S12.</b> HPLC traces for <b>AI-G</b> Eluent, 100% MeOH; Pressure, 10 bar; Injection volume, 10 μL; Oven temp., 40 °C).                                                                                                                                                                                                           | S7       |
| 13      | <b>Figure S13.</b> DLS data representing the particle size of a) <b>AI-NH<sub>3</sub><sup>+</sup></b> aggregate, b) <b>AI-G</b> aggregate, and c) <b>ID-Checker</b>                                                                                                                                                                      | S8       |
| 14      | <b>Fig. S14.</b> Effects of NOZ, PCL, <b>AI</b> , <b>AI-NH<sub>3</sub><sup>+</sup></b> aggregate, <b>AI-G</b> aggregate, and <b>ID-Checker</b> on tubulin polymerization.                                                                                                                                                                | S8       |
| 15      | <b>Fig. S15.</b> Immunofluorescence staining of microtubules in A549 cells.                                                                                                                                                                                                                                                              | S9       |
| 16      | <b>Fig. S16.</b> Immunofluorescence staining of GLUT1 channels in A549 cells.                                                                                                                                                                                                                                                            | S10      |
| 17      | <b>Fig. S17.</b> a) Effects on the cell cycle distribution of MCF-7 cells upon treatment with <b>AI</b> , <b>AI-NH<sub>3</sub><sup>+</sup></b> , <b>AI-G</b> , and <b>ID-Checker</b> at various concentrations (0, 0.05, 0.25, 0.50, and 1.0 μM) 24 h followed by staining with PI to determine the proportion of DNA by flow cytometry. | S11      |
| 18      | <b>Table S1.</b> Body weight of experimental animals (g)                                                                                                                                                                                                                                                                                 | S12      |
| 19      | <b>Table S2.</b> Docking scores for <b>AI</b> , <b>AI-NH<sub>3</sub><sup>+</sup></b> , and <b>AI-G</b> for binding with tubulin in the colchicine and nocodazole binding sites.                                                                                                                                                          | S12      |
| 20      | <b>Fig. S18.</b> The docking poses of a) <b>AI</b> , b) <b>AI-NH<sub>3</sub><sup>+</sup></b> , c) <b>AI-G</b> , in colchicine binding site (PDB ID: 4O2B) and d) <b>AI</b> , e) <b>AI-NH<sub>3</sub><sup>+</sup></b> , f) <b>AI-G</b> in the nocodazole binding site of tubulin (PDB ID: 5CA1).                                          | S12      |

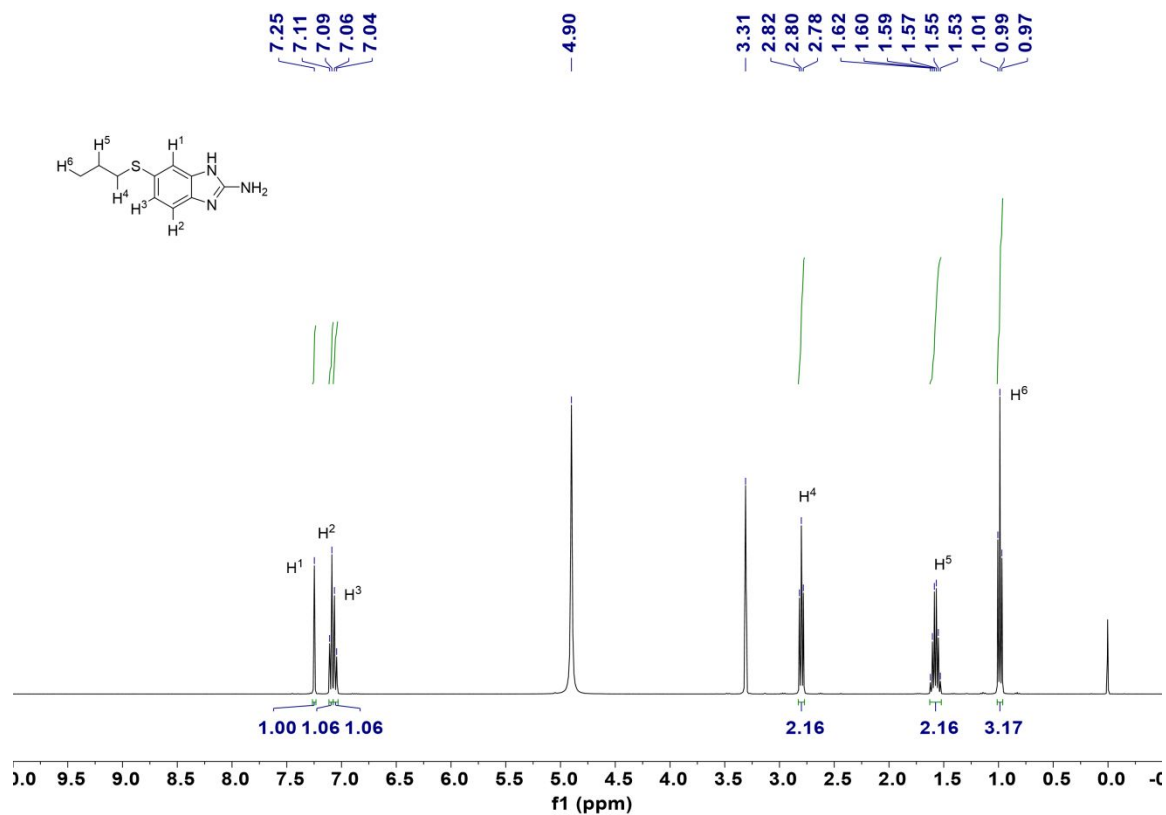

Figure S1. <sup>1</sup>H NMR spectrum of AI-NH<sub>2</sub> in CD<sub>3</sub>OD.

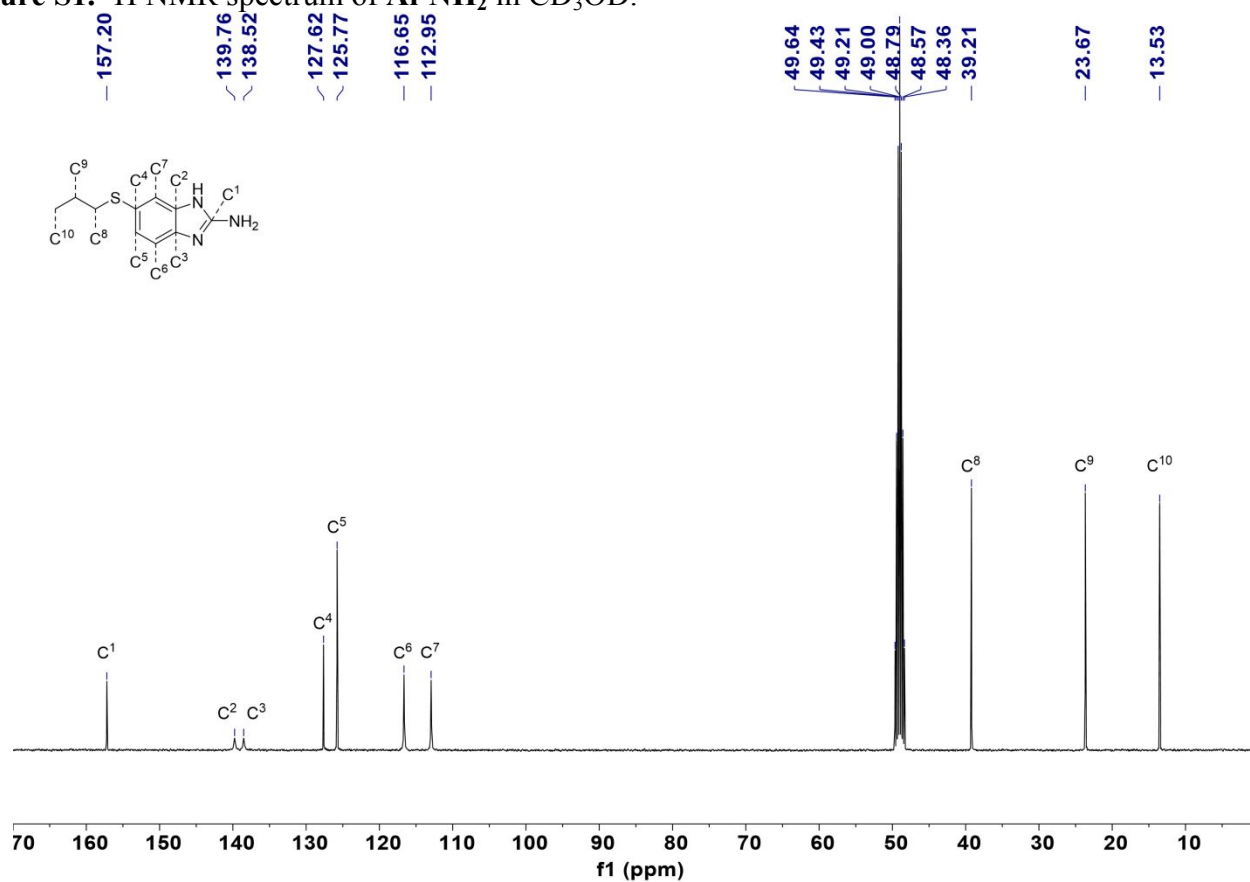

Figure S2. <sup>13</sup>C NMR spectrum of AI-NH<sub>2</sub> in CD<sub>3</sub>OD.

RT : 0.81 min Scan# : 22  
 Elements : C 10/0, H 21/0, N 3/0, S 1/0  
 Mass Tolerance : 1000ppm, 5mmu if m/z < 5, 50mmu if m/z > 50  
 Unsaturation (U.S.) : -0.5 - 20.0

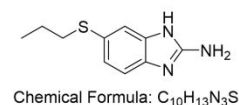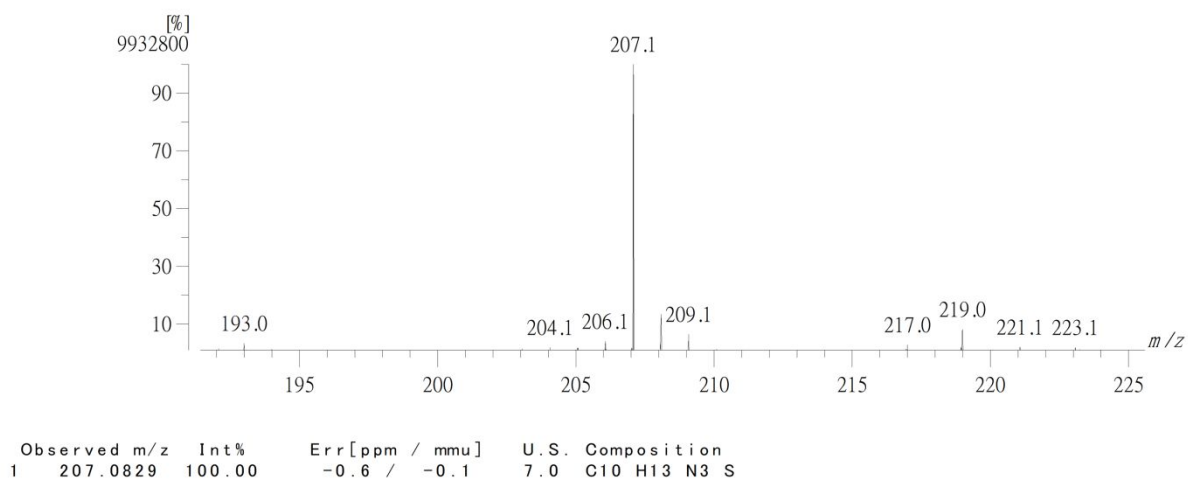

Figure S3. Mass spectrum of Al-NH<sub>2</sub>.

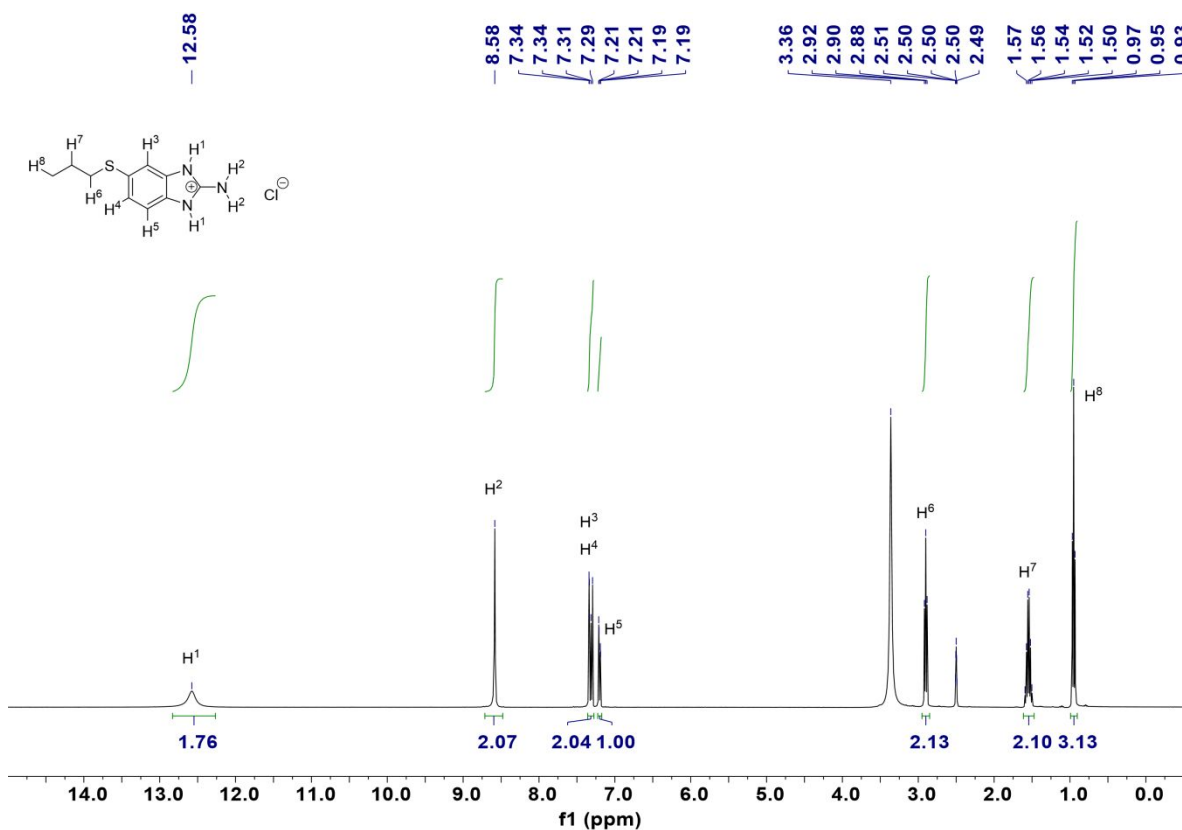

Figure S4. <sup>1</sup>H NMR spectrum of Al-NH<sub>2</sub>.HCl in DMSO-d<sub>6</sub>.

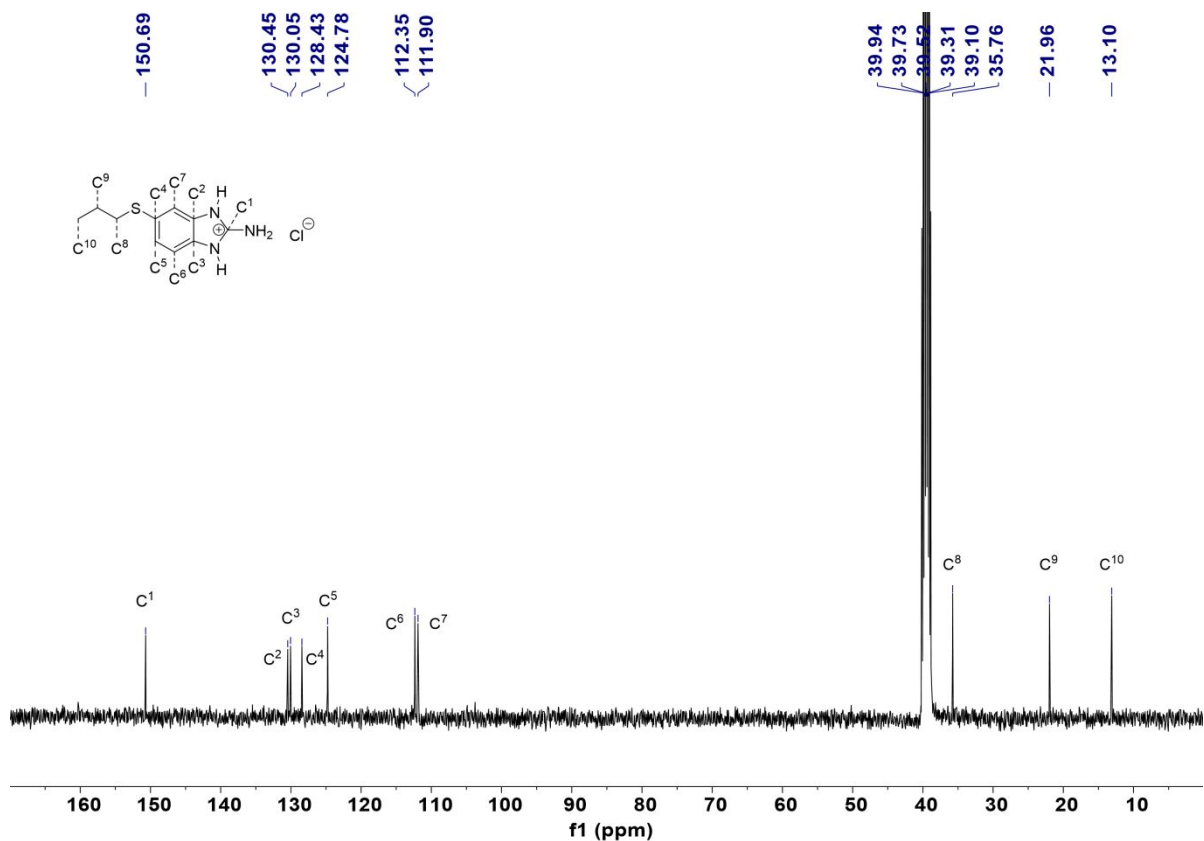

Fig. S5. <sup>13</sup>C NMR spectrum of Al-NH<sub>2</sub>.HCl in DMSO-d<sub>6</sub>.

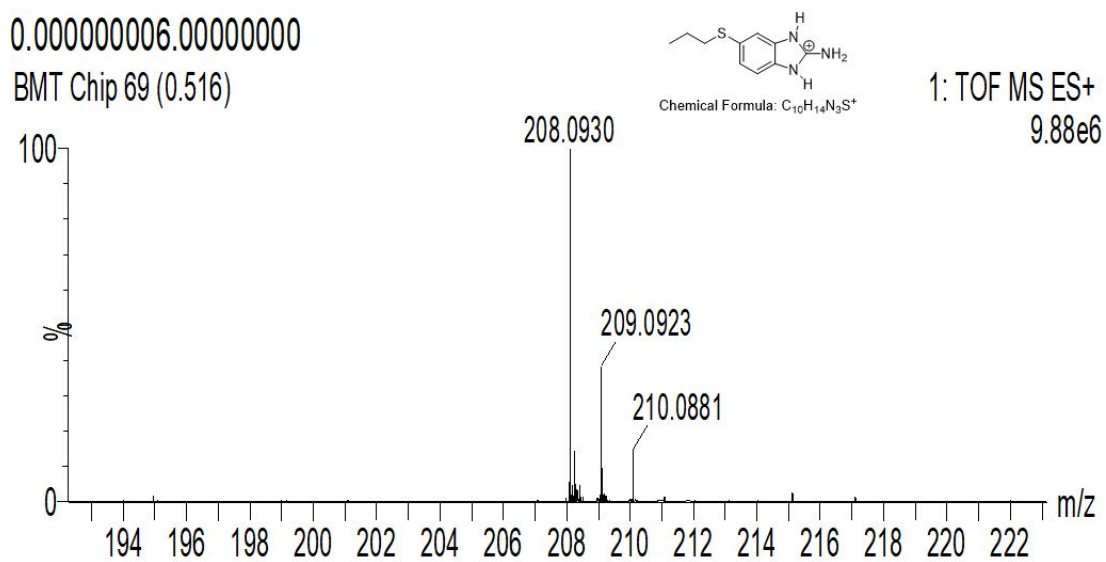

Fig. S6. Mass spectrum of Al-NH<sub>2</sub>.HCl

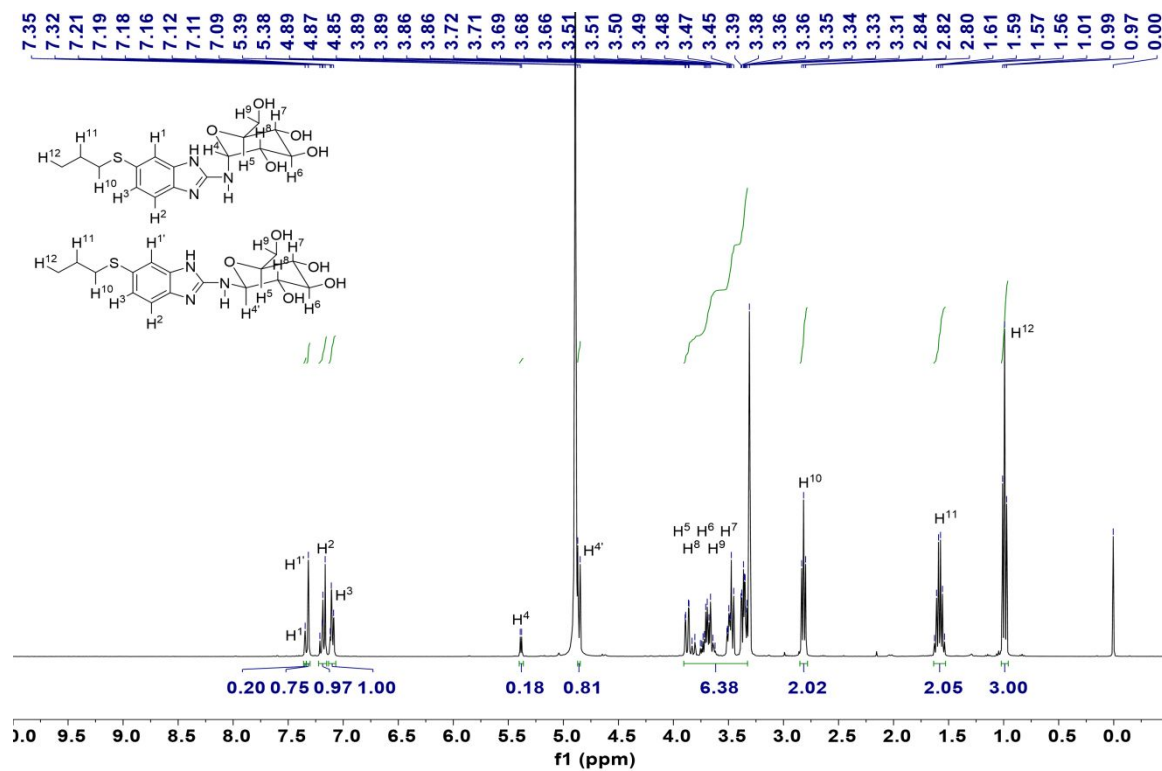

Fig. S7. <sup>1</sup>H NMR spectrum of Al-G in CD<sub>3</sub>OD.

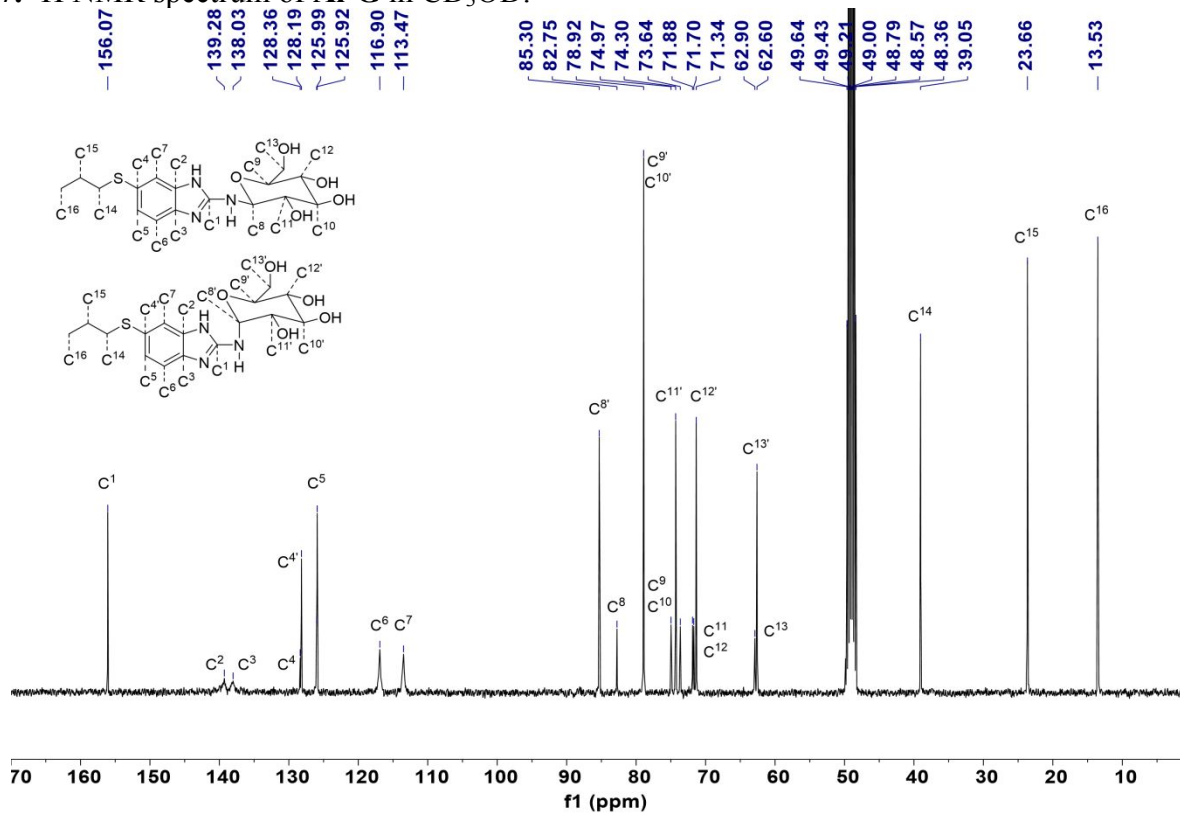

Fig. S8. <sup>13</sup>C NMR spectrum of Al-G in CD<sub>3</sub>OD.

RT : 0.03 min Scan# : (238)  
 Elements : C 100/0, H 100/0, N 5/0, O 10/0, S 1/0  
 Mass Tolerance : 1000ppm, 5mmu if m/z < 5, 10mmu if m/z > 10  
 Unsaturation (U.S.) : 0.0 - 15.0

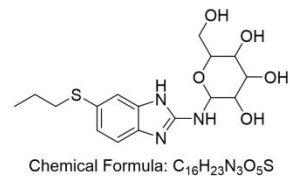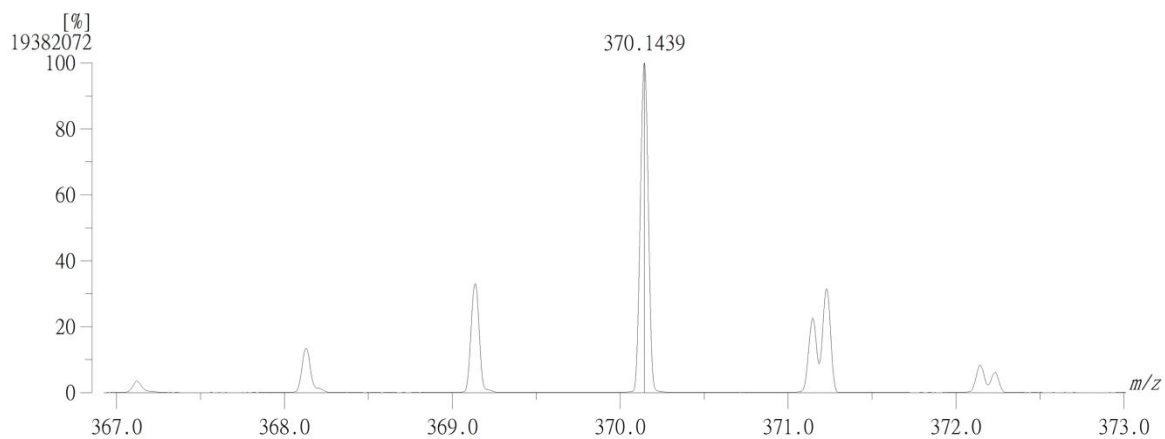

| Observed m/z | Int%   | Err [ppm / mmu] | U. S. Composition   |
|--------------|--------|-----------------|---------------------|
| 1 370.1439   | 100.00 | +0.6 / +0.2     | 7.5 C16 H24 N3 O5 S |

**Fig. S9.** Mass spectrum of Al-G.

**<Chromatogram>**

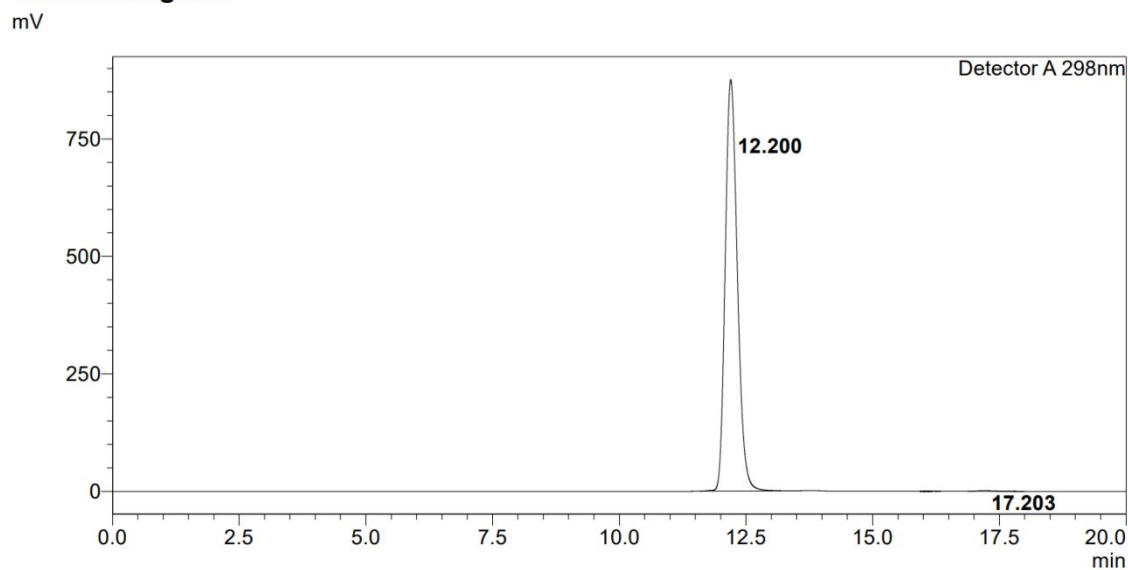

**<Peak Table>**

| Detector A 298nm |           |        |         |          |         |
|------------------|-----------|--------|---------|----------|---------|
| Peak#            | Ret. Time | Height | Height% | Area     | Area%   |
| 1                | 12.200    | 874500 | 99.838  | 14570874 | 99.770  |
| 2                | 17.203    | 1418   | 0.162   | 33606    | 0.230   |
| Total            |           | 875918 | 100.000 | 14604480 | 100.000 |

**Fig. S10.** HPLC trace for 1mM Al-NH<sub>2</sub> in MeOH (Eluent, 100% MeOH; Pressure, 10 bar; Injection volume, 10 μL; Oven temp., 40 °C).

<Chromatogram>

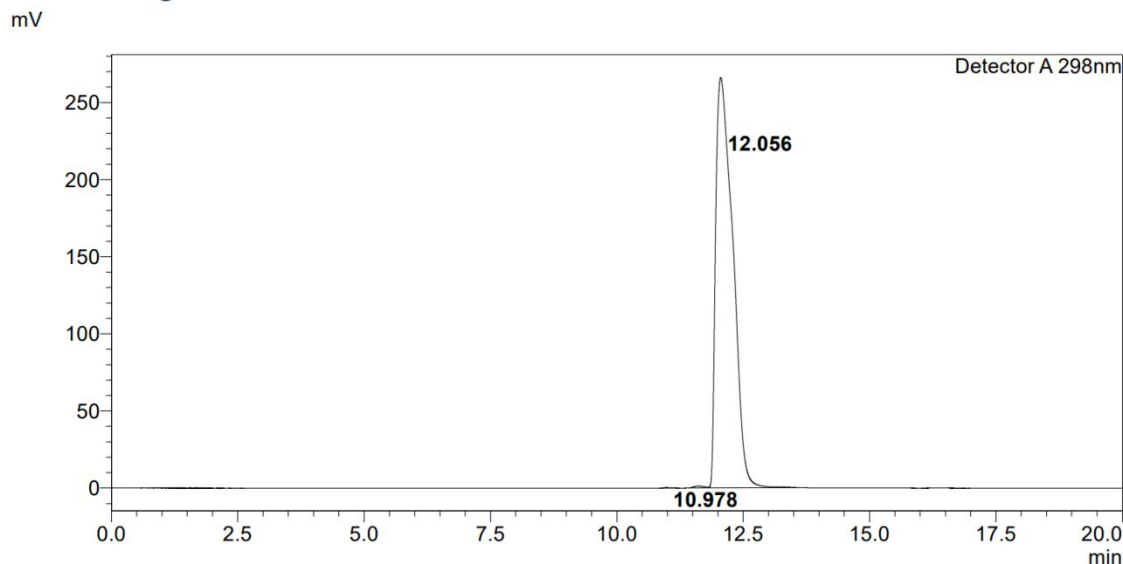

<Peak Table>

| Detector A 298nm |           |        |         |         |         |
|------------------|-----------|--------|---------|---------|---------|
| Peak#            | Ret. Time | Height | Height% | Area    | Area%   |
| 1                | 10.978    | 394    | 0.148   | 2776    | 0.044   |
| 2                | 12.056    | 266026 | 99.852  | 6274852 | 99.956  |
| Total            |           | 266420 | 100.000 | 6277628 | 100.000 |

Fig. S11. HPLC traces for Al-NH<sub>2</sub>.HCl (Eluent, 100% MeOH; Pressure, 10 bar; Injection volume, 10 μL; Oven temp., 40 °C).

<Chromatogram>

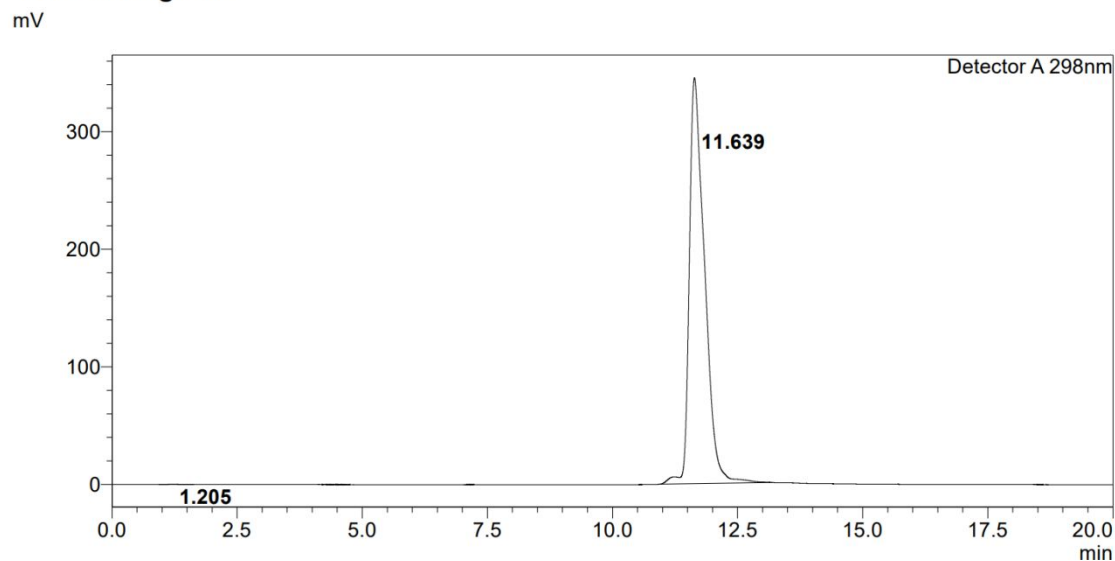

<Peak Table>

| Detector A 298nm |           |        |         |         |         |
|------------------|-----------|--------|---------|---------|---------|
| Peak#            | Ret. Time | Height | Height% | Area    | Area%   |
| 1                | 1.205     | 192    | 0.055   | 3592    | 0.049   |
| 2                | 11.639    | 345059 | 99.945  | 7345757 | 99.951  |
| Total            |           | 345251 | 100.000 | 7349348 | 100.000 |

Fig. S12. HPLC traces for Al-G (Eluent, 100% MeOH; Pressure, 10 bar; Injection volume, 10 μL; Oven temp., 40 °C).

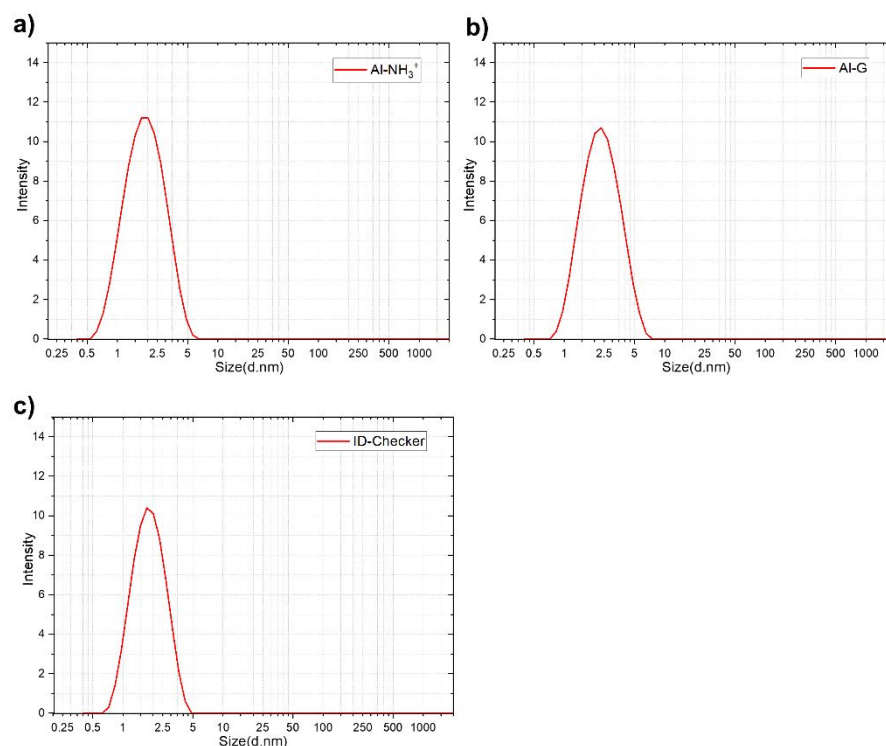

**Figure S13.** DLS data representing the particle size of a) Al-NH<sub>3</sub><sup>+</sup> aggregate, b) Al-G aggregate, and c) ID-Checker

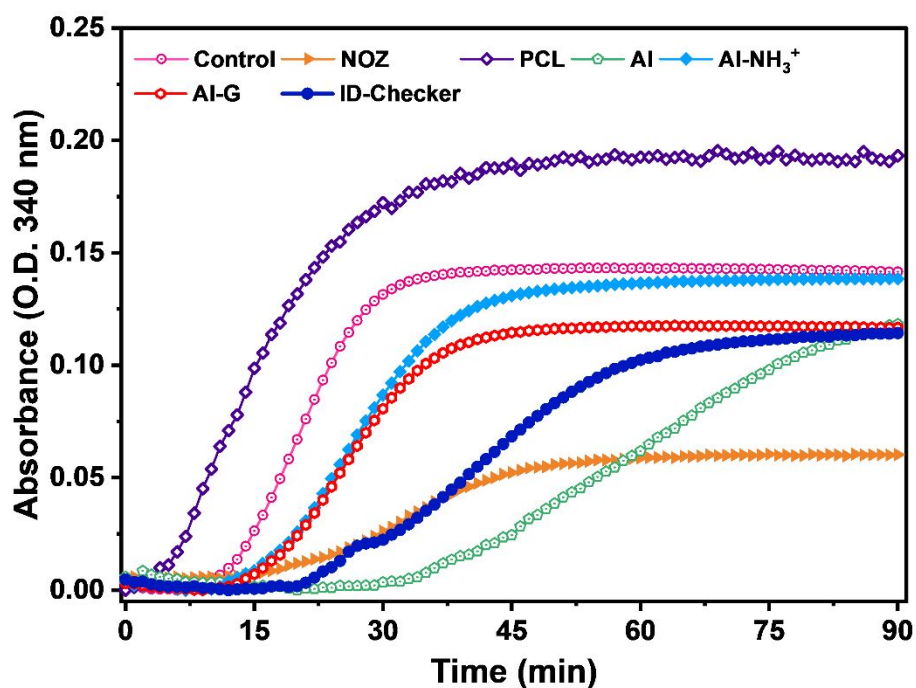

**Fig. S14.** Effects of NOZ, PCL, AI, Al-NH<sub>3</sub><sup>+</sup> aggregate, Al-G aggregate, and ID-Checker on tubulin polymerization. Effect of ID-Checker on tubulin polymerization. Polymerization of purified tubulin into microtubules was measured using spectrometer over 90 min at 1 min interval by incubating it at 37 °C in the absence (control) or presence of 0.20 μM ID-Checker, 20 μM NOZ, 20 μM PCL, 20 μM AI, 20 μM Al-NH<sub>3</sub><sup>+</sup> aggregate, and 20 μM Al-G aggregate.



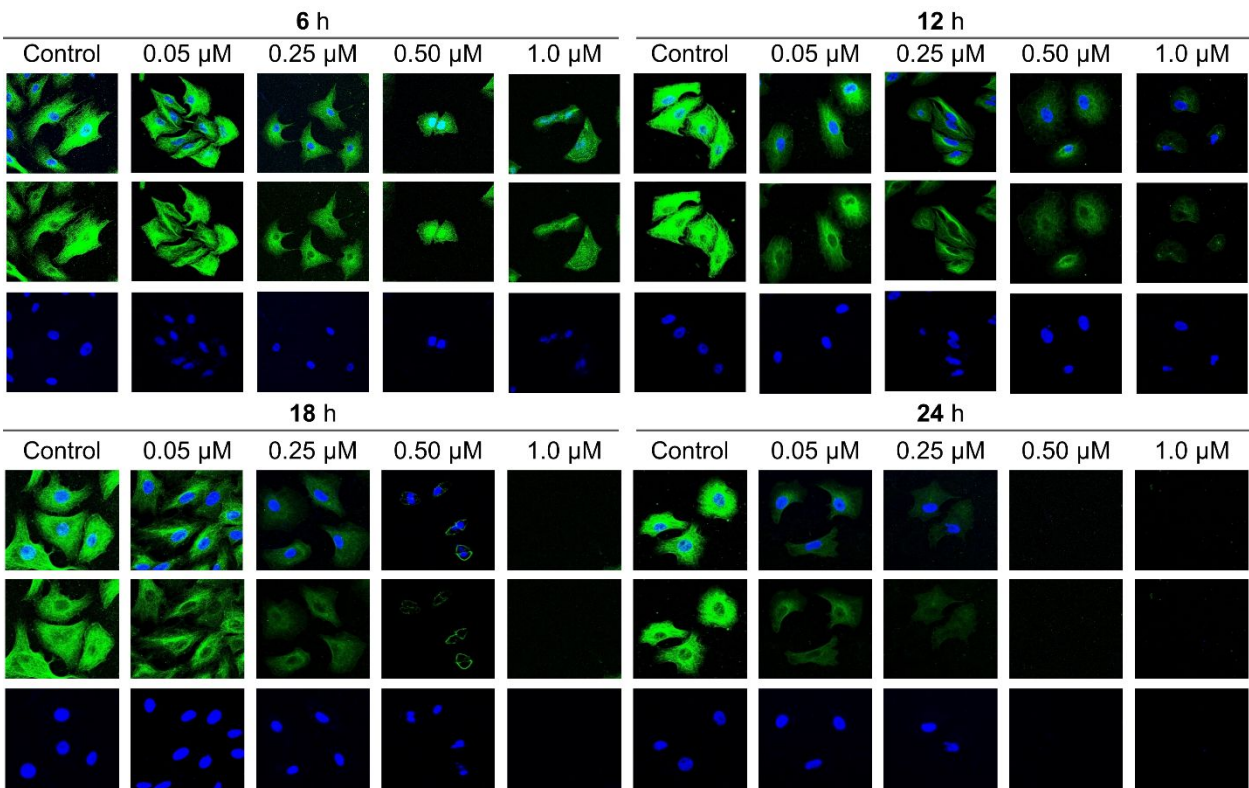

**Fig. S15.** Immunofluorescence staining of microtubules in A549 cells. Cells were treated with vehicle (0.9% saline), 0.05, 0.25, 0.50, and 1.0 μM **ID-Checker** for 6, 12, 18, and 24 h. Cells were incubated with anti- $\alpha$ -tubulin antibody followed by anti-mouse IgG/FITC antibody (green fluorescence) to stain the microtubules, and nuclei were stained by subsequent incubation of cells with (DAPI, blue fluorescence). Bottom, DAPI; middle, microtubule network; top, merged images observed by confocal microscopy.

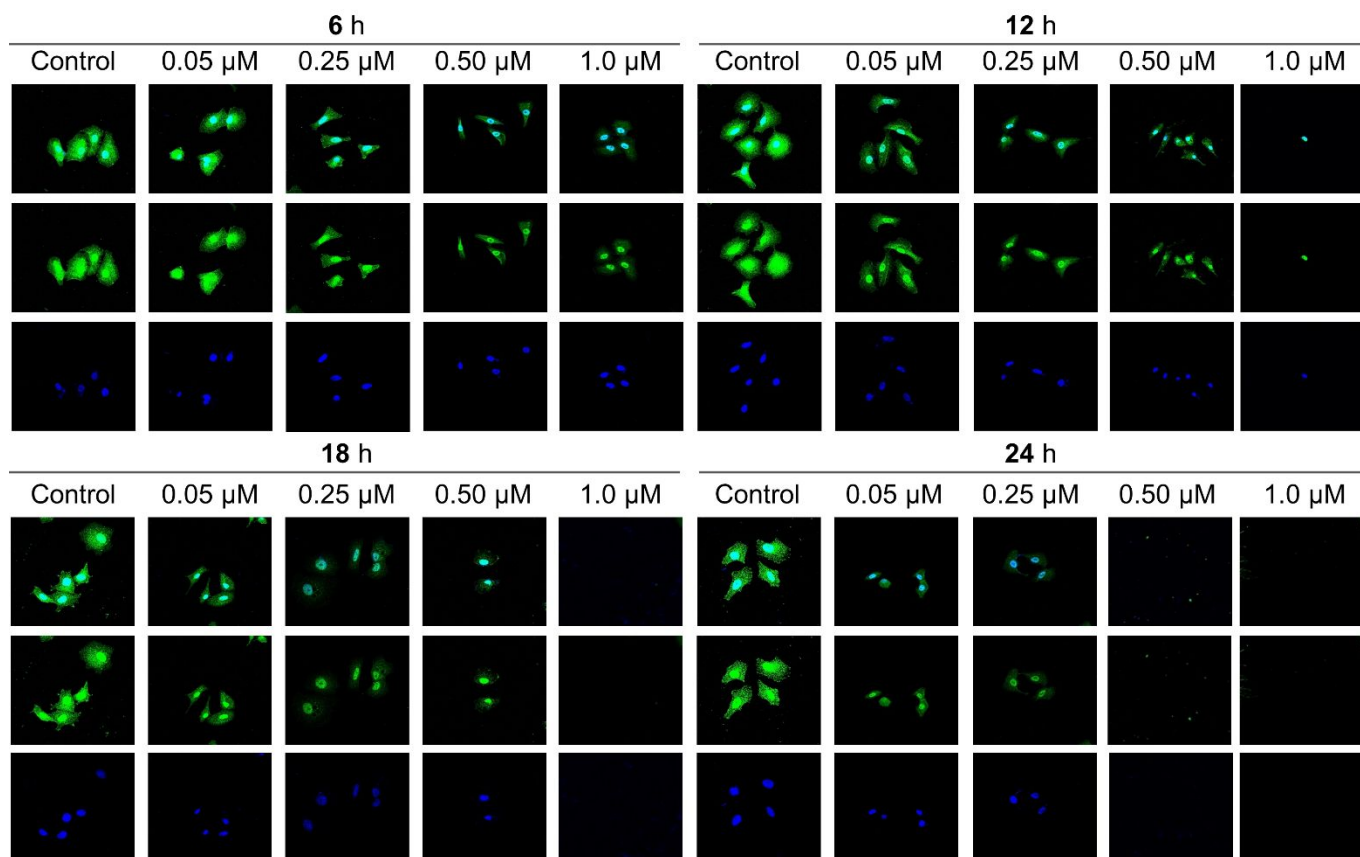

**Fig. S16.** Immunofluorescence staining of GLUT1 channels in A549 cells. Cells were treated with vehicle (0.9% saline), 0.05, 0.25, 0.50 and 1.0  $\mu$ M **ID-Checker** for 6, 12, 18, and 24 h. Cells were incubated with rabbit anti-GLUT1 antibody followed by donkey anti-rabbit IgG/ALEXA488 antibody (green fluorescence) to stain the GLUT channels and nuclei were stained by subsequent incubation of cells with DAPI (blue fluorescence). Bottom, DAPI; middle, GLUT channels; top, merged images observed by confocal microscopy.

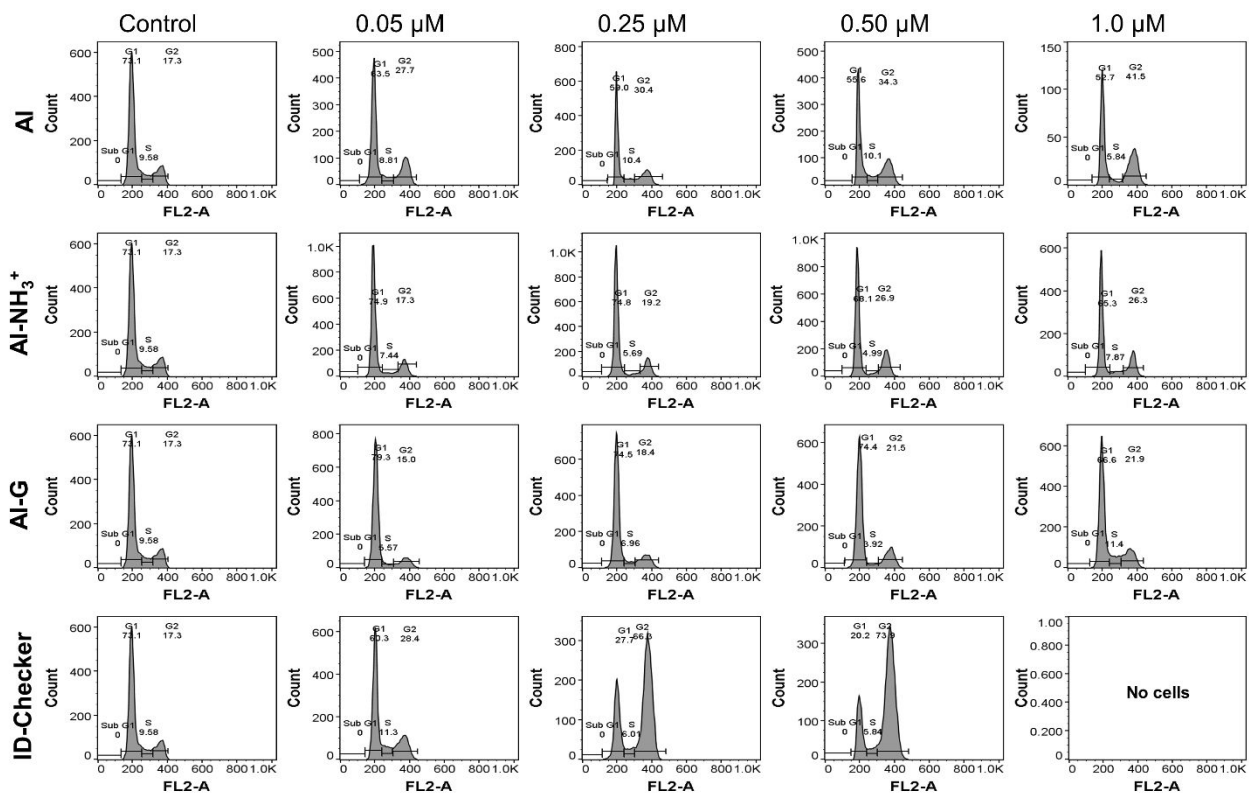

**Fig. S17.** Effects on the cell cycle distribution of MCF-7 cells upon treatment with AI, AI-NH<sub>3</sub><sup>+</sup>, AI-G, and ID-Checker at various concentrations (0, 0.05, 0.25, 0.50, and 1.0 μM) 24 h followed by staining with PI to determine the proportion of DNA by flow cytometry.

**Table S1.** Body weight of experimental animals (g)

| Day | G1           | G2           | G3           | G4           |
|-----|--------------|--------------|--------------|--------------|
| 0   | 19.10 ± 0.16 | 19.00 ± 0.16 | 19.00 ± 0.16 | 19.00 ± 0.28 |
| 11  | 19.35 ± 0.20 | 19.15 ± 0.20 | 18.85 ± 0.18 | 19.00 ± 0.13 |

**Table S2.** Docking scores for AI, AI-NH<sub>3</sub><sup>+</sup>, and AI-G for binding with tubulin in the colchicine and nocodazole binding sites.

| Compound                        | CBS                                   |                                        | NBS                                   |                                        |
|---------------------------------|---------------------------------------|----------------------------------------|---------------------------------------|----------------------------------------|
|                                 | Glide Score (kcal mol <sup>-1</sup> ) | Glide Energy (kcal mol <sup>-1</sup> ) | Glide Score (kcal mol <sup>-1</sup> ) | Glide Energy (kcal mol <sup>-1</sup> ) |
| AI                              | -6.64                                 | -49.0                                  | -7.31                                 | -46.9                                  |
| AI-NH <sub>3</sub> <sup>+</sup> | -6.44                                 | -33.3                                  | -7.14                                 | -30.7                                  |
| AI-G                            | -6.20                                 | -30.9                                  | -6.61                                 | -34.5                                  |

CBS, colchicine binding site; NBS, nocodazole binding site

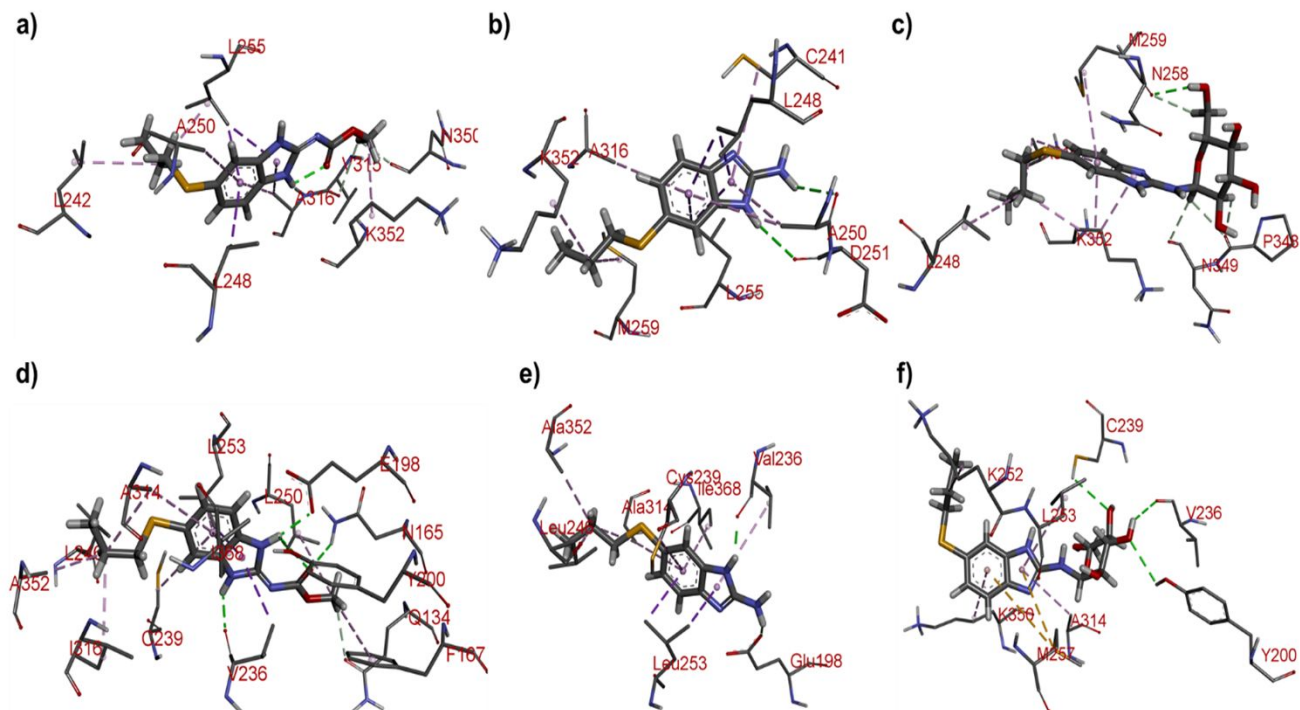**Fig. S18.** The docking poses of a) AI, b) AI-NH<sub>3</sub><sup>+</sup>, c) AI-G, in colchicine binding site (PDB ID: 4O2B) and d) AI, e) AI-NH<sub>3</sub><sup>+</sup>, f) AI-G in the nocodazole binding site of tubulin (PDB ID: 5CA1).
